# Supplementary material for: Interaction of Uperin Peptides with Model Membranes: Molecular Dynamics Study
Source: MDPI journal article supplement (doi:10.3390/membranes13040370), 2023-03-23
Supplement: s1 [file s1]

# Interaction of Uperin Peptides with Model Membranes: Molecular Dynamics Study

Elena A. Ermakova \* and Rauf Kh. Kurbanov

Kazan Institute of Biochemistry and Biophysics, FRC Kazan Scientific Center of RAS, Lobachevsky Str. 2/31, Kazan 420111, Russia

\* Correspondence: ermakova@kibb.knc.ru

**Table S1.** Thickness of the bilayer, area per lipid, rate of water permeability, an average number of water molecules inside the bilayer.

| Trajectory Number | Thickness (Å) | Area per Lipid (Å <sup>2</sup> ) | Water/ Rate (ns <sup>-1</sup> ) | Average Number of Water Molecules Inside the Bilayer |
|-------------------|---------------|----------------------------------|---------------------------------|------------------------------------------------------|
| Tr1               | 41.4          | 59.8                             | 0.018                           | 1                                                    |
| Tr2               | 41.8          | 58.4                             | 0.060                           | 1                                                    |
| Tr3               | 42.7          | 58.4                             | 0.030                           | 2                                                    |
| Tr4               | 41.8          | 57.8                             | 0.025                           | 2                                                    |
| Tr5               | 41.8          | 59.5                             | 0.207                           | 12                                                   |
| Tr6               | 41.8          | 58.9                             | 0.134                           | 11                                                   |
| Tr7               | 41.2          | 59.5                             | 0.052                           | 5                                                    |
| Tr8               | 41.4          | 59.4                             | 0.052                           | 3                                                    |
| Tr9               | 39.8          | 62.9                             | 0.240                           | 1                                                    |
| Tr10              | 42.8          | 57.8                             | 0.030                           | 3                                                    |
| membrane          | 42.1          | 58.1                             | 0.020                           | 2                                                    |

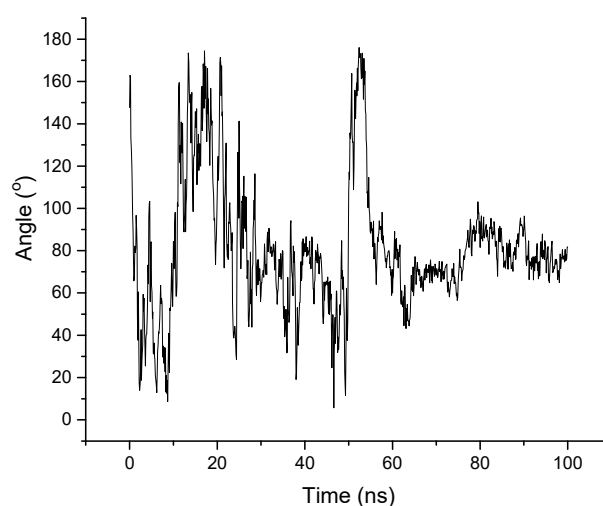

**Figure S1.** The time evolution of the angle (in °) between the main principal axis of uperin peptide and the normal to the membrane surface for the trajectory Tr1.
